# Supplementary material for: Reporting errors, incidence and risk factors for postpartum haemorrhage and progression to severe PPH: a prospective observational study
Source: PubMed Central journal article supplement — BJOG. 2014 Feb 12;121(7):876–88. doi: 10.1111/1471-0528.12588 (PMC4282054; doi:10.1111/1471-0528.12588), 2014-02-12
Supplement: bjo0121-0876-SD5.pdf [file bjo0121-0876-SD5.pdf]

**Table S2.** Characteristics of the study population by PPH (estimated blood loss  $\geq 500$ ml) or no PPH, following correction of errors, categorisation and weighting.

| <b>Demography</b>                                              | <b>No PPH</b>          | <b>PPH <math>\geq 500</math> ml</b> | <b>All</b> |
|----------------------------------------------------------------|------------------------|-------------------------------------|------------|
| No. of women/notes reviewed                                    | 653                    | 1242                                | 1895       |
| No. of women represented (nw)                                  | 6585                   | 3352                                | 9937       |
| <b>Age (years)</b>                                             | <b>% of population</b> |                                     |            |
| <20                                                            | 5.0                    | 2.8                                 | 4.2        |
| 20-24                                                          | 15.9                   | 8.9                                 | 13.5       |
| 25-29                                                          | 22.4                   | 22.0                                | 22.2       |
| 30-34                                                          | 32.0                   | 36.6                                | 33.6       |
| 35-39                                                          | 19.8                   | 22.6                                | 20.7       |
| 40+                                                            | 5.0                    | 7.2                                 | 5.7        |
| <b>Ethnicity</b>                                               |                        |                                     |            |
| White                                                          | 61.2                   | 55.3                                | 59.2       |
| Black British                                                  | 2.4                    | 1.0                                 | 2.0        |
| Black Caribbean                                                | 4.4                    | 4.2                                 | 4.3        |
| Black African                                                  | 14.2                   | 22.3                                | 16.9       |
| Bangladeshi                                                    | 2.0                    | 1.1                                 | 1.7        |
| Indian                                                         | 3.0                    | 3.8                                 | 3.3        |
| Pakistani                                                      | 3.7                    | 3.9                                 | 3.7        |
| Other Asian                                                    | 0.7                    | 0.9                                 | 0.8        |
| Chinese                                                        | 0.6                    | 1.3                                 | 0.8        |
| Mixed                                                          | 3.0                    | 1.6                                 | 2.6        |
| Unknown                                                        | 4.8                    | 4.5                                 | 4.7        |
| <b>Body Mass Index (BMI) (kg/m<sup>2</sup>)</b>                |                        |                                     |            |
| <19                                                            | 6.3                    | 4.8                                 | 5.8        |
| 19-24.9                                                        | 50.8                   | 51.2                                | 50.9       |
| 25-29.9                                                        | 22.3                   | 22.3                                | 22.3       |
| 30-34.9                                                        | 10.3                   | 11.9                                | 10.8       |
| 35+                                                            | 4.1                    | 4.8                                 | 4.4        |
| <b>Index of multiple deprivation</b>                           |                        |                                     |            |
| Quintile 1 (least deprived)                                    | 7.3                    | 6.6                                 | 7.1        |
| Quintile 2                                                     | 9.8                    | 10.1                                | 9.9        |
| Quintile 3                                                     | 14.1                   | 15.2                                | 14.5       |
| Quintile 4                                                     | 29.5                   | 28.0                                | 29.0       |
| Quintile 5 (Most deprived)                                     | 38.8                   | 39.3                                | 39.0       |
| <b>Parity</b>                                                  |                        |                                     |            |
| Primiparity                                                    | 47.0                   | 58.8                                | 51.0       |
| <b>Smoking</b>                                                 |                        |                                     |            |
| At booking                                                     | 13.2                   | 10.2                                | 12.2       |
| <b>Previous obstetric history (includes primiparous women)</b> |                        |                                     |            |
| No previous PPH                                                | 96.5                   | 94.7                                | 95.9       |
| 1 x previous PPH                                               | 3.5                    | 4.8                                 | 3.9        |
| >1 previous PPH                                                | 0                      | 0.3                                 | 0.1        |
| Previous Caesarean section                                     | 9.2                    | 22.6                                | 13.7       |
| <b>Pre-existing medical conditions</b>                         |                        |                                     |            |
| Diabetes                                                       | 0.9                    | 1.2                                 | 1.0        |
| Epilepsy (on medication)                                       | 0.4                    | 0.7                                 | 0.5        |
| Depression (on medication)                                     | 2.8                    | 2.2                                 | 2.6        |
| Hypertension                                                   | 0.7                    | 1.6                                 | 1.0        |
| Fibroids                                                       | 3.8                    | 6.1                                 | 4.5        |
| Female genital mutilation                                      | 2.8                    | 3.3                                 | 2.9        |
| Clotting or thromboembolic disorder                            | 0.6                    | 1.8                                 | 1.0        |
| Uterine abnormality                                            | 0.2                    | 0.3                                 | 0.2        |
| Assisted conception                                            | 1.3                    | 4.8                                 | 2.5        |
| <b>Current pregnancy</b>                                       |                        |                                     |            |
| Multiple pregnancy                                             | 1.8                    | 4.0                                 | 2.6        |
| Antenatal admissions                                           | 14.3                   | 19.1                                | 15.9       |

|                                         |      |      |      |
|-----------------------------------------|------|------|------|
| Any antenatal day unit attendance       | 47.3 | 53.6 | 49.5 |
| Abdominal pain                          | 15.7 | 17.2 | 16.3 |
| Itching                                 | 2.0  | 2.3  | 2.1  |
| External cephalic version               | 1.3  | 1.8  | 1.5  |
| Pre-eclampsia screen                    | 6.8  | 10.7 | 8.1  |
| Reduced fetal movements                 | 12.8 | 14.4 | 13.3 |
| Possible spontaneous ROM                | 13.8 | 15.3 | 14.3 |
| Generally unwell (no diagnosis)         | 3.1  | 3.8  | 3.3  |
| Possible UTI                            | 0.0  | 0.4  | 0.1  |
| Vaginal bleed (no admission)            | 3.9  | 3.8  | 3.8  |
| Placenta praevia                        | 0.2  | 1.4  | 0.6  |
| APH requiring admission                 | 3.4  | 4.6  | 3.8  |
| UTI (confirmed)                         | 9.0  | 9.9  | 9.3  |
| Gestational hypertension                | 2.1  | 4.6  | 2.9  |
| Pre-eclampsia                           | 0.9  | 4.3  | 2.1  |
| Anaemia (Hb<10.5g/ml)                   | 12.4 | 14.1 | 12.9 |
| <b>Intrapartum</b>                      |      |      |      |
| Spontaneous onset of labour             | 74.7 | 51.3 | 66.8 |
| Induced onset of labour                 | 14.2 | 19.3 | 15.9 |
| Augmented onset of labour               | 5.0  | 6.9  | 5.6  |
| No labour elective Caesarean#           | 6.2  | 22.5 | 11.7 |
| Temperature (>37.2°C)                   | 12.3 | 27.8 | 17.3 |
| Ruptured membranes >48 h                | 2.7  | 4.1  | 3.2  |
| Prostin                                 | 13.1 | 18.0 | 14.8 |
| Syntocinon® to induce or augment labour | 18.4 | 35.9 | 24.3 |
| <b>Birth</b>                            |      |      |      |
| SVD                                     | 76.1 | 25.9 | 59.2 |
| Instrumental vaginal delivery*          | 12.1 | 17.1 | 13.8 |
| Elective Caesarean section#             | 5.6  | 18.4 | 9.9  |
| Emergency Caesarean section             | 6.2  | 38.6 | 17.1 |
| <b>Third stage of labour</b>            |      |      |      |
| Physiological                           | 9.2  | 3.4  | 7.2  |
| Syntocinon® IM                          | 7.3  | 5.4  | 6.7  |
| Syntocinon® IV                          | 13.4 | 58.1 | 28.5 |
| Syntometrine® IM                        | 69.7 | 30.8 | 56.6 |
| Retained placenta                       | 1.3  | 4.4  | 2.4  |

nw; Number of women represented by the reviewed notes allowing for the weighted sampling. \*Forceps or ventouse; #Figures differ as some women planning elective Caesarean section had onset of labour, so Caesarean section classified as emergency.
