# Supplementary material for: Reporting errors, incidence and risk factors for postpartum haemorrhage and progression to severe PPH: a prospective observational study
Source: PubMed Central journal article supplement — BJOG. 2014 Feb 12;121(7):876–88. doi: 10.1111/1471-0528.12588 (PMC4282054; doi:10.1111/1471-0528.12588), 2014-02-12
Supplement: bjo0121-0876-SD7.pdf [file bjo0121-0876-SD7.pdf]

**Table S3.** Changes in estimated blood loss (according to groups and sub-groups of risk factors as appropriate to pre-pregnancy, during pregnancy, labour and birth), principal predictors of postpartum haemorrhage (PPH)  $\geq 500$ ml and conditional predictors of progression to severe PPH  $\geq 1500$ ml; unadjusted associations.

| Predictive variable                        | Mean change in EBL (ml) | Odds Ratio (OR) (95% CI) |                              |
|--------------------------------------------|-------------------------|--------------------------|------------------------------|
|                                            |                         | $\geq 500$ ml            | $\geq 1500$ ml               |
|                                            |                         | All women                | Women with PPH $\geq 500$ ml |
| <b>Group A: Pre-pregnancy</b>              |                         |                          |                              |
| <b>Sub-group i: Age</b>                    |                         |                          |                              |
| Age for each 10 years                      | 67 (38 to 97)           | 1.46 (1.21 to 1.77)      | 0.97 (0.76 to 1.25)          |
| <b>Ethnicity</b>                           |                         |                          |                              |
| White (reference group)                    |                         |                          |                              |
| Black British                              | -53 (-152 to 46)        | 0.46 (0.20 to 1.06)      | 2.01 (0.69 to 5.84)          |
| Black Caribbean                            | -48 (-125 to 29)        | 1.01 (0.57 to 1.78)      | 0.47 (0.21 to 1.03)          |
| Black African                              | 128 (64 to 192)         | 1.68 (1.23 to 2.28)      | 1.13 (0.76 to 1.69)          |
| Bangladeshi                                | -78 (-170 to 14)        | 0.56 (0.22 to 1.46)      | 0.62 (0.15 to 2.52)          |
| Indian                                     | 117 (-33 to 267)        | 1.40 (0.73 to 2.67)      | 1.44 (0.45 to 4.64)          |
| Pakistani                                  | 45 (-39 to 129)         | 1.13 (0.62 to 2.04)      | 1.09 (0.45 to 2.64)          |
| Chinese                                    | 237 (34 to 441)         | 2.54 (0.73 to 8.82)      | 1.25 (0.46 to 3.41)          |
| Other Asian                                | 88 (-175 to 351)        | 1.35 (0.38 to 4.75)      | 0.73 (0.17 to 3.04)          |
| Mixed                                      | -96 (-174 to -19)       | 0.59 (0.26 to 1.33)      | 0.52 (0.15 to 1.76)          |
| Other/unknown                              | 90 (1 to 180)           | 1.01 (0.60 to 1.71)      | 1.27 (0.70 to 2.30)          |
| <b>Sub-group ii: Local deprivation</b>     |                         |                          |                              |
| IMD*: most deprived quintile               | 4 (-35 to 43)           | 1.00 (0.80 to 1.26)      | 0.96 (0.69 to 1.34)          |
| Barriers to housing & services             | 61 (22 to 100)          | 1.29 (1.02 to 1.62)      | 0.87 (0.64 to 1.20)          |
| Education, skills and training             | -63 (-126 to 0)         | 0.57 (0.39 to 0.85)      | 1.98 (1.18 to 3.32)          |
| <b>Sub-group iii: General risk factors</b> |                         |                          |                              |
| Current smoker                             | -82 (-142 to -22)       | 0.74 (0.51 to 1.07)      | 0.48 (0.29 to 0.80)          |
| BMI per unit (Kg/m <sup>2</sup> )          | 6 (1 to 10)             | 1.01 (0.99 to 1.04)      | 1.04 (1.01 to 1.07)          |
| Anaemia (iron at first appointment)        | 6 (-151 to 163)         | 0.76 (0.24 to 2.43)      | 1.31 (0.35 to 4.95)          |
| Essential hypertension                     | 172 (-73 to 417)        | 2.09 (0.67 to 6.55)      | 0.40 (0.11 to 1.45)          |
| Diabetes                                   | 34 (-121 to 189)        | 1.31 (0.40 to 4.25)      | 0.91 (0.26 to 3.17)          |

|                                               |                    |                      |                     |
|-----------------------------------------------|--------------------|----------------------|---------------------|
| Depression                                    | -49 (-128 to 29)   | 0.80 (0.39 to 1.64)  | 0.77 (0.31 to 1.89) |
| Epilepsy                                      | 46 (-120 to 212)   | 1.76 (0.33 to 9.44)  | 1.04 (0.22 to 4.99) |
| Lupus                                         | -102 (-442 to 238) | 0.48 (0.05 to 4.61)  | #                   |
| Fibroids                                      | 116 (3 to 229)     | 1.60 (0.94 to 2.70)  | 0.87 (0.51 to 1.50) |
| FGM                                           | 75 (-32 to 181)    | 1.15 (0.60 to 2.19)  | 1.59 (0.83 to 3.08) |
| Clotting/ thrombotic disorders                | 189 (-32 to 411)   | 3.14 (0.91 to 10.90) | 0.86 (0.32 to 2.32) |
| Uterine anomaly                               | -26 (-365 to 312)  | 1.44 (0.13 to 15.66) | 0.82 (0.07 to 9.79) |
| Planned pregnancy                             | 36 (-6 to 78)      | 1.06 (0.82 to 1.38)  | 1.35 (0.95 to 1.92) |
| Assisted conception                           | 234 (107 to 360)   | 3.80 (1.69 to 8.57)  | 1.26 (0.63 to 2.54) |
| Gestation at booking                          | 0 (-3 to 3)        | 1.00 (0.98 to 1.01)  | 0.98 (0.96 to 1.01) |
| <b>Sub-group iv: Obstetric history</b>        |                    |                      |                     |
| Previous PPH                                  | 164 (7 to 320)     | 1.52 (0.86 to 2.68)  | 1.85 (1.01 to 3.40) |
| Number of previous PPH                        | 153 (22 to 284)    | 1.62 (0.99 to 2.64)  | 1.57 (0.95 to 2.59) |
| Previous caesarean section                    | 195 (118 to 273)   | 2.80 (2.00 to 3.94)  | 0.68 (0.43 to 1.05) |
| Parity (using 0 as reference group)           |                    |                      |                     |
| 1                                             | -73 (-119 to -27)  | 0.64 (0.49 to 0.83)  | 1.18 (0.80 to 1.74) |
| 2                                             | -96 (-150 to -41)  | 0.62 (0.44 to 0.89)  | 1.67 (1.02 to 2.74) |
| 3+                                            | -77 (-161 to 7)    | 0.58 (0.37 to 0.91)  | 1.34 (0.77 to 2.31) |
| Multiparity                                   | -80 (-118 to -42)  | 0.63 (0.50 to 0.79)  | 1.33 (0.97 to 1.83) |
| <b>Group B: Pregnancy</b>                     |                    |                      |                     |
| <b>Sub-group v: Current pregnancy</b>         |                    |                      |                     |
| Multiple pregnancy                            | 208 (90 to 326)    | 2.15 (1.05 to 4.41)  | 1.47 (0.80 to 2.70) |
| Number of fetuses                             | 215 (100 to 330)   | 2.18 (1.11 to 4.29)  | 1.44 (0.82 to 2.53) |
| Antenatal admissions                          | 42 (-10 to 94)     | 1.37 (1.01 to 1.87)  | 0.84 (0.58 to 1.23) |
| Admissions >24/40                             | 54 (0 to 107)      | 1.52 (1.10 to 2.09)  | 0.80 (0.54 to 1.18) |
| <b>Sub-group vi: Antenatal day unit (ADU)</b> |                    |                      |                     |
| Any ADU attendance                            | 49 (11 to 87)      | 1.28 (1.02 to 1.60)  | 1.25 (0.91 to 1.72) |
| >1 ADU attendance                             | 27 (6 to 49)       | 1.15 (1.01 to 1.31)  | 1.08 (0.92 to 1.27) |
| Abdominal pain                                | 11 (-35 to 57)     | 1.10 (0.81 to 1.50)  | 0.91 (0.63 to 1.31) |
| IM iron                                       | 512 (493 to 531)   | #                    | #                   |
| Itching                                       | 39 (-76 to 155)    | 1.13 (0.54 to 2.40)  | 1.20 (0.55 to 2.63) |
| Pre-eclampsia screen                          | 81 (12 to 150)     | 1.62 (1.07 to 2.43)  | 0.90 (0.59 to 1.37) |

|                                                                      |                     |                      |                       |
|----------------------------------------------------------------------|---------------------|----------------------|-----------------------|
| Growth scan                                                          | 33 (-190 to 256)    | 0.40 (0.12 to 1.31)  | 1.64 (0.35 to 7.81)   |
| Generally unwell (no diagnosis)                                      | 132 (13 to 251)     | 1.22 (0.66 to 2.23)  | 2.30 (1.09 to 4.88)   |
| ADU for APH (no admission)                                           | 53 (-56 to 163)     | 0.99 (0.56 to 1.74)  | 1.60 (0.87 to 2.92)   |
| <b>Sub-group vii: Placenta praevia</b>                               |                     |                      |                       |
| Placenta praevia                                                     | 1270 (410 to 2130)  | 7.74 (1.02 to 58.41) | 4.86 (1.99 to 11.87)  |
| Major placenta praevia                                               | 1931 (525 to 3336)  | NA                   | 3.67 (1.26 to 10.71)  |
| Minor placenta praevia                                               | 477 (-41 to 996)    | 2.56 (0.30 to 21.59) | 6.66 (1.25 to 35.39)  |
| Anterior placenta praevia                                            | 2909 (1150 to 4669) | NA                   | 12.30 (4.49 to 33.72) |
| Posterior placenta praevia                                           | 564 (61 to 1068)    | 4.81 (0.59 to 38.89) | 2.41 (0.74 to 7.86)   |
| <b>Sub-group viii: APH and UTI</b>                                   |                     |                      |                       |
| APH                                                                  | 172 (15 to 329)     | 1.36 (0.78 to 2.37)  | 1.96 (1.15 to 3.34)   |
| 'Warning' APH                                                        | 1145 (325 to 1965)  | 7.26 (0.96 to 55.16) | 4.10 (1.65 to 10.20)  |
| Urinary tract infection                                              | 20 (-41 to 80)      | 1.08 (0.73 to 1.60)  | 1.12 (0.69 to 1.82)   |
| <b>Sub-group ix: Pre-eclampsia and anaemia</b>                       |                     |                      |                       |
| Gestational hypertension                                             | 131 (10 to 252)     | 2.28 (1.15 to 4.54)  | 0.74 (0.39 to 1.41)   |
| Pre-eclampsia (all)                                                  | 219 (113 to 326)    | 4.63 (1.79 to 11.96) | 0.76 (0.39 to 1.50)   |
| Pre-eclampsia <34/40                                                 | 235 (17 to 452)     | 6.44 (0.81 to 51.41) | 0.73 (0.21 to 2.51)   |
| Pre-eclampsia ≥34/40                                                 | 212 (92 to 333)     | 4.12 (1.41 to 11.98) | 0.78 (0.35 to 1.72)   |
| Anaemia <10.5 g/ml                                                   | 40 (-20 to 101)     | 1.15 (0.83 to 1.60)  | 1.27 (0.84 to 1.92)   |
| Anaemia <11.1 g/ml                                                   | 5 (-39 to 50)       | 1.00 (0.79 to 1.28)  | 1.05 (0.74 to 1.48)   |
| Polyhydramnios                                                       | 75 (-178 to 328)    | 0.29 (0.03 to 2.90)  | 6.57 (0.41 to 105.69) |
| <b>Sub-group x: Medications pre-birth (in the week before birth)</b> |                     |                      |                       |
| Antibiotics                                                          | 52 (5 to 98)        | 1.35 (1.02 to 1.80)  | 1.08 (0.76 to 1.53)   |
| Antihypertensives (including for Pre-eclampsia)                      | 105 (27 to 182)     | 1.76 (1.11 to 2.78)  | 0.79 (0.50 to 1.27)   |
| Aspirin                                                              | 129 (14 to 244)     | 1.50 (0.81 to 2.81)  | 1.02 (0.55 to 1.91)   |
| Medication for diabetes                                              | 100 (-44 to 244)    | 2.62 (1.04 to 6.57)  | 0.91 (0.42 to 2.00)   |
| Steroids for fetal reasons                                           | 106 (12 to 201)     | 1.17 (0.77 to 1.79)  | 2.06 (1.25 to 3.40)   |
| Oral iron                                                            | 23 (-25 to 70)      | 1.08 (0.82 to 1.44)  | 1.40 (0.99 to 2.00)   |
| Steroids for maternal reasons                                        | 53 (-65 to 170)     | 1.17 (0.59 to 2.33)  | 1.67 (0.69 to 4.02)   |
| Pain relief                                                          | 154 (27 to 281)     | 1.62 (0.73 to 3.58)  | 1.38 (0.65 to 2.91)   |
| Threatened preterm labour                                            | 246 (-220 to 712)   | 1.77 (0.59 to 5.31)  | 0.65 (0.21 to 2.04)   |
| Thyroid disease                                                      | 241 (-99 to 581)    | 1.55 (0.65 to 3.71)  | 2.04 (0.75 to 5.57)   |

| <b>Group C: Labour and birth</b>        |                   |                           |                      |
|-----------------------------------------|-------------------|---------------------------|----------------------|
| <b>Sub-group xi: Gestation at birth</b> |                   |                           |                      |
| Gestational age at birth                | 0 (-9 to 9)       | 1.03 (0.98 to 1.09)       | 0.96 (0.91 to 1.02)  |
| <b>Sub-group xii: Birth weight</b>      |                   |                           |                      |
| Maximum birth weight (Kg)               | 50 (15 to 85)     | 1.50 (1.22 to 1.85)       | 1.06 (0.83 to 1.35)  |
| Total birth weight (Kg)                 | 69 (38 to 101)    | 1.55 (1.27 to 1.89)       | 1.16 (0.93 to 1.44)  |
| Macrosomia >4 Kg                        | 128 (55 to 201)   | 1.94 (1.33 to 2.82)       | 1.21 (0.76 to 1.95)  |
| Macrosomia >4.5 Kg                      | 156 (31 to 281)   | 2.96 (1.19 to 7.36)       | 0.81 (0.38 to 1.71)  |
| <b>Sub-group xiii: Onset of labour</b>  |                   |                           |                      |
| Spontaneous onset (reference group)     |                   |                           |                      |
| Augmented                               | 113 (14 to 211)   | 1.96 (1.19 to 3.24)       | 1.21 (0.57 to 2.58)  |
| Induced                                 | 100 (50 to 150)   | 1.90 (1.39 to 2.60)       | 0.89 (0.60 to 1.33)  |
| None (prelabour caesarean)              | 262 (202 to 323)  | 5.07 (3.41 to 7.53)       | 0.56 (0.38 to 0.84)  |
| Duration of ROM (days)                  | 65 (28 to 102)    | 1.54 (1.20 to 1.99)       | 0.93 (0.70 to 1.23)  |
| Duration of ROM unrecorded              | 280 (219-341)     | 6.29 (4.28 to 9.54)       | 0.42 (0.25 to 0.68)  |
| Prostin                                 | 54 (5 to 104)     | 1.43 (1.04 to 1.96)       | 0.98 (0.66 to 1.45)  |
| <b>Sub-group xiv: Intrapartum</b>       |                   |                           |                      |
| Syntocinon®                             | 137 (92 to 183)   | 2.40 (1.84 to 3.14)       | 0.81 (0.58 to 1.14)  |
| Duration of Syntocinon® (hours)         | 10 (0 to 19)      | 1.06 (1.00 to 1.13)       | 1.03 (0.98 to 1.08)  |
| Spinal anaesthesia                      | 181 (137 to 226)  | 4.10 (2.93 to 5.75)       | 0.37 (0.25 to 0.54)  |
| Epidural analgesia                      | 159 (117 to 202)  | 2.91 (2.22 to 3.81)       | 0.71 (0.52 to 0.97)  |
| Temperature                             |                   |                           |                      |
| Temperature >37.2°C                     | 190 (127 to 252)  | 2.65 (1.86 to 3.77)       | 0.92 (0.62 to 1.38)  |
| Temperature >37.5°C                     | 282 (169 to 396)  | 4.60 (2.34 to 9.06)       | 1.12 (0.64 to 1.95)  |
| Temperature >37.8°C                     | 413 (234 to 592)  | 7.94 (2.48 to 25.43)      | 1.31 (0.62 to 2.78)  |
| Temperature >38.0°C                     | 724 (368 to 1080) | 132.72 (17.53 to 1004.68) | 2.49 (0.92 to 6.69)  |
| All temperature > 37.0°C                | 686 (412 to 960)  | 47.99 (7.16 to 321.46)    | 1.66 (0.71 to 3.89)  |
| Temperature unrecorded                  | 41 (-2 to 84)     | 1.28 (1.00 to 1.65)       | 0.73 (0.53 to 1.01)  |
| Evidence of chorioamnionitis            | 796 (261 to 1330) | NA                        | 4.65 (1.09 to 19.89) |
| <b>Sub-group xv: Birth</b>              |                   |                           |                      |
| Mode of birth - SVD (reference group)   |                   |                           |                      |
| Instrumental vaginal birth              | 194 (132 to 255)  | 3.84 (2.71 to 5.44)       | 0.45 (0.29 to 0.70)  |

|                                         |                     |                        |                     |
|-----------------------------------------|---------------------|------------------------|---------------------|
| Elective caesarean section              | 298 (238 to 358)    | 8.95 (5.80 to 13.79)   | 0.20 (0.13 to 0.33) |
| Emergency caesarean section             | 409 (357 to 461)    | 17.05 (11.47 to 25.34) | 0.37 (0.25 to 0.55) |
| <b>Sub-group xvi: Third stage</b>       |                     |                        |                     |
| Physiological third stage               | -177 (-223 to -130) | 0.47 (0.30 to 0.75)    | 3.18 (1.75 to 5.77) |
| Syntocinon® IM                          | 18 (-71 to 106)     | 0.70 (0.44 to 1.11)    | 1.83 (0.83 to 4.02) |
| Syntocinon® IV (bolus)                  | 317 (276 to 359)    | 8.56 (6.42 to 11.41)   | 0.44 (0.32 to 0.60) |
| Syntometrine® IM                        | -234 (-272 to -196) | 0.19 (0.15 to 0.25)    | 1.63 (1.15 to 2.29) |
| Syntocinon® IV increased                | 36 (-23 to 94)      | 1.10 (0.71 to 1.69)    | 0.71 (0.42 to 1.18) |
| Syntocinon® 40/50 IU infusion commenced | 272 (232 to 313)    | 6.07 (4.64 to 7.92)    | 0.46 (0.34 to 0.63) |
| Retained placenta                       | 374 (154 to 594)    | 3.49 (1.55 to 7.82)    | 1.76 (1.01 to 3.06) |
| Interval to suturing (hours)            | 113 (14 to 212)     | 0.97 (0.81 to 1.16)    | 1.44 (1.21 to 1.72) |
| Interval to suturing unknown            | 65 (-3 to 133)      | 1.69 (1.05 to 2.72)    | 0.56 (0.32 to 0.95) |

Key: For continuous measures (e.g. age, BMI) the change is given for each additional 10 years of age or 1kg/m<sup>2</sup> of BMI. For variables with more than 2 categories (e.g. ethnicity) a reference group is declared (White), and comparisons are made to this. \*IMD; Index of multiple deprivation & two of seven subscales based on area of residence, England and Wales shown. Methods S1 for full list. NA; Not applicable, all women had EBL<sub>≥</sub>500ml. #; numbers too small.

Summary of significant factors:

*(a) Pre-pregnancy*

Before adjusting for potential confounders, significant pre-pregnancy predictors for PPH were age, Black African ethnicity, index of multiple deprivation (barriers to housing & services), assisted conception and previous caesarean, with index of multiple deprivation (education, skills and training) and multiparity being protective. Significant risk factors for progression to severe PPH were index of multiple deprivation (education, skills and training), BMI, previous PPH and parity (=2), with smoking being protective.

*(b) During pregnancy*

Predictors of PPH before adjustment included multiple pregnancy, antenatal day unit attendance, antenatal admission, placenta praevia, gestational hypertension, pre- eclampsia screen and diagnosis, use of antibiotics, antihypertensives and diabetes medication. Predictors of progression to severe PPH acquired during pregnancy were antenatal day attendance with 'generally unwell (no diagnosis)', placenta praevia (major, minor and anterior), APH, 'warning' APH and steroids for fetal reasons.

*(c) Labour and birth*

Labour and birth predictors of PPH included birthweight (Kg) and macrosomia, no labour onset, induction, augmentation, duration of ruptured membranes, use of Prostin and Syntocinon®, regional analgesia and anaesthesia, temperature >37.0°C, instrumental delivery, caesarean (elective and emergency), third stage Syntocinon® IV bolus or infusion and retained placenta. Unrecorded temperature, duration of ruptured membranes and interval to suturing were all predictors of PPH. Both physiological third stage management and Syntometrine® IM were protective. Intrapartum predictors of progression to severe PPH were evidence of chorioamnionitis, physiological third stage management, Syntometrine® IM, retained placenta and interval

to suturing. Protective factors included no labour onset, regional analgesia and anaesthesia, instrumental delivery, caesarean (elective and emergency) and third stage Syntocinon® IV bolus and infusion. Unrecorded duration of ruptured membranes or interval to suturing appeared protective
